# Supplementary material for: Development of Antibody Detection ELISA Based on Immunoreactive Toxins and Toxin-Derived Peptides to Evaluate the Neutralization Potency of Equine Plasma against Naja atra in Taiwan
Source: Toxins (Basel). 2021 Nov 19;13(11):818. doi: 10.3390/toxins13110818 (PMC8622849; doi:10.3390/toxins13110818)
Supplement: Supplementary file 1 [file toxins-13-00818-s001.zip › toxins-1443319-supplementary.pdf]

Supplementary Information

# Development of Antibody Detection ELISA Based on Immuno-reactive Toxins and Toxin-Derived Peptides to Evaluate the Neutralization Potency of Equine Plasma against *Naja atra* in Taiwan

Chien-Chun Liu <sup>1</sup>, Yung-Chin Hsiao <sup>1,2,3</sup>, Lichieh Julie Chu <sup>1,2,3</sup>, Po-Jung Wang <sup>1</sup>, Chien-Hsin Liu <sup>4</sup>, Wen-Chin Hsieh <sup>4</sup> and Jau-Song Yu <sup>1,2,3,5,\*</sup>

<sup>1</sup> Molecular Medicine Research Center, Chang Gung University, Tao-Yuan 33302, Taiwan; d000014743@cgu.edu.tw (C.-C.L.), hschin@mail.cgu.edu.tw (Y.-C.H.), julie.chu@mail.cgu.edu.tw (L.J.C.), d000016308@cgu.edu.tw (P.-J.W.)

<sup>2</sup> Graduate Institute of Biomedical Sciences, College of Medicine, Chang Gung University, Tao-Yuan 33302, Taiwan

<sup>3</sup> Liver Research Center, Chang Gung Memorial Hospital, Linkou, Tao-Yuan 33305, Taiwan.

<sup>4</sup> Center for Diagnostics and Vaccine Development, Centers for Disease Control, Ministry of Health and Welfare, Taipei 11561, Taiwan; liuch@cdc.gov.tw (C.-H.L.); vac@cdc.gov.tw (W.-C.H.)

<sup>5</sup> Research Center for Food and Cosmetic Safety, College of Human Ecology, Chang Gung University of Science and Technology, Tao-Yuan 33303, Taiwan

\* Correspondence: yusong@mail.cgu.edu.tw; Tel.: +886-3-2118800 (ext. 5171); Fax: +886-3-2118891

**Table S1.** Detailed description of hyperimmunized equine antiserum.

| Batch No. | Horse No. | Sampling Date | Neutralization Titer (T.U.) | Defined Group |
|-----------|-----------|---------------|-----------------------------|---------------|
| 1         | 351       | 2018/11/13    | <60                         | Low-Potency   |
| 2         | 354       | 2020/3/17     | <60                         | Low-Potency   |
| 3         | 356       | 2019/11/5     | <60                         | Low-Potency   |
| 4         | 356       | 2020/3/17     | <60                         | Low-Potency   |
| 5         | 356       | 2020/3/31     | <60                         | Low-Potency   |
| 6         | 356       | 2020/5/26     | <60                         | Low-Potency   |
| 7         | 401       | 2019/12/30    | <60                         | Low-Potency   |
| 8         | 401       | 2020/2/4      | <60                         | Low-Potency   |
| 9         | 401       | 2020/3/3      | <60                         | Low-Potency   |
| 10        | 401       | 2020/3/31     | <60                         | Low-Potency   |
| 11        | 406       | 2018/4/17     | <60                         | Low-Potency   |
| 12        | 406       | 2018/6/26     | <60                         | Low-Potency   |
| 13        | 407       | 2020/3/17     | <60                         | Low-Potency   |
| 14        | 418       | 2019/12/30    | <60                         | Low-Potency   |
| 15        | 418       | 2020/2/4      | <60                         | Low-Potency   |
| 16        | 418       | 2020/3/3      | <60                         | Low-Potency   |
| 17        | 418       | 2020/3/31     | <60                         | Low-Potency   |
| 18        | 420       | 2019/12/30    | <60                         | Low-Potency   |
| 19        | 420       | 2020/1/14     | <60                         | Low-Potency   |
| 20        | 354       | 2018/11/27    | ≥60                         | High-Potency  |
| 21        | 354       | 2018/12/11    | ≥60                         | High-Potency  |
| 22        | 354       | 2019/5/7      | ≥60                         | High-Potency  |
| 23        | 354       | 2019/5/21     | ≥60                         | High-Potency  |
| 24        | 354       | 2019/10/22    | ≥60                         | High-Potency  |
| 25        | 354       | 2019/11/5     | ≥60                         | High-Potency  |
| 26        | 354       | 2020/3/31     | ≥60                         | High-Potency  |
| 27        | 354       | 2020/4/14     | ≥60                         | High-Potency  |
| 28        | 354       | 2020/4/28     | ≥60                         | High-Potency  |

---

|    |     |            |     |              |
|----|-----|------------|-----|--------------|
| 29 | 354 | 2020/5/12  | ≥60 | High-Potency |
| 30 | 354 | 2020/5/26  | ≥60 | High-Potency |
| 31 | 356 | 2019/4/23  | ≥60 | High-Potency |
| 32 | 356 | 2019/5/21  | ≥60 | High-Potency |
| 33 | 356 | 2019/10/22 | ≥60 | High-Potency |
| 34 | 356 | 2020/4/14  | ≥60 | High-Potency |
| 35 | 356 | 2020/4/28  | ≥60 | High-Potency |
| 36 | 356 | 2020/5/12  | ≥60 | High-Potency |
| 37 | 366 | 2018/11/13 | ≥60 | High-Potency |
| 38 | 407 | 2018/4/17  | ≥60 | High-Potency |
| 39 | 407 | 2019/4/23  | ≥60 | High-Potency |
| 40 | 407 | 2019/5/7   | ≥60 | High-Potency |
| 41 | 407 | 2019/5/21  | ≥60 | High-Potency |
| 42 | 407 | 2019/10/22 | ≥60 | High-Potency |
| 43 | 407 | 2019/11/5  | ≥60 | High-Potency |
| 44 | 407 | 2020/3/31  | ≥60 | High-Potency |
| 45 | 407 | 2020/4/14  | ≥60 | High-Potency |
| 46 | 407 | 2020/4/28  | ≥60 | High-Potency |
| 47 | 407 | 2020/5/12  | ≥60 | High-Potency |
| 48 | 407 | 2020/5/26  | ≥60 | High-Potency |
| 49 | 420 | 2020/2/4   | ≥60 | High-Potency |
| 50 | 420 | 2020/3/3   | ≥60 | High-Potency |
| 51 | 420 | 2020/3/17  | ≥60 | High-Potency |

---

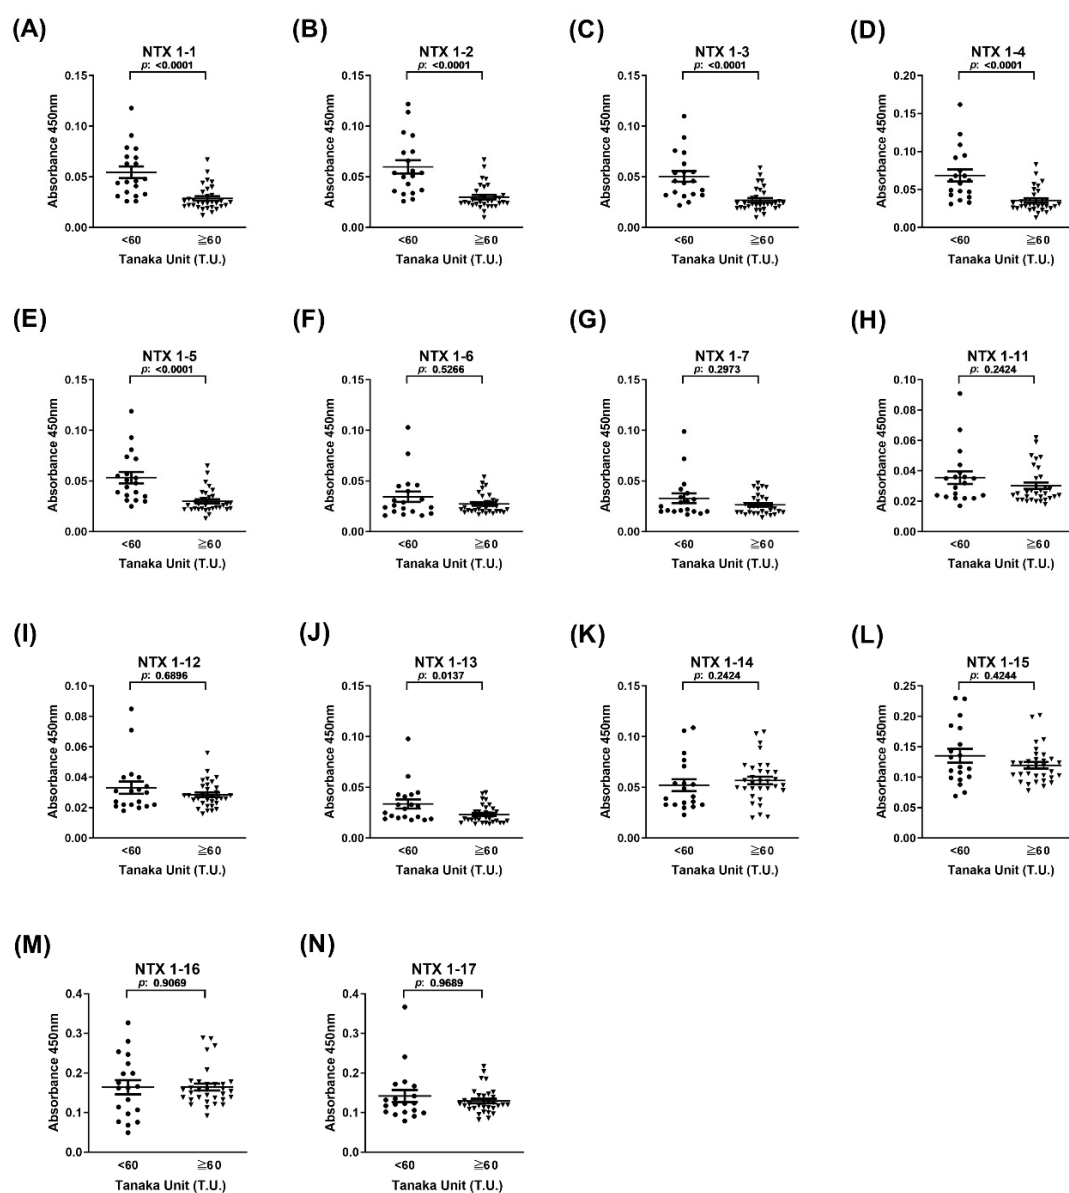

**Figure S1.** ELISA signals for 14 NTX-derived peptides of horse plasma samples with different potencies.

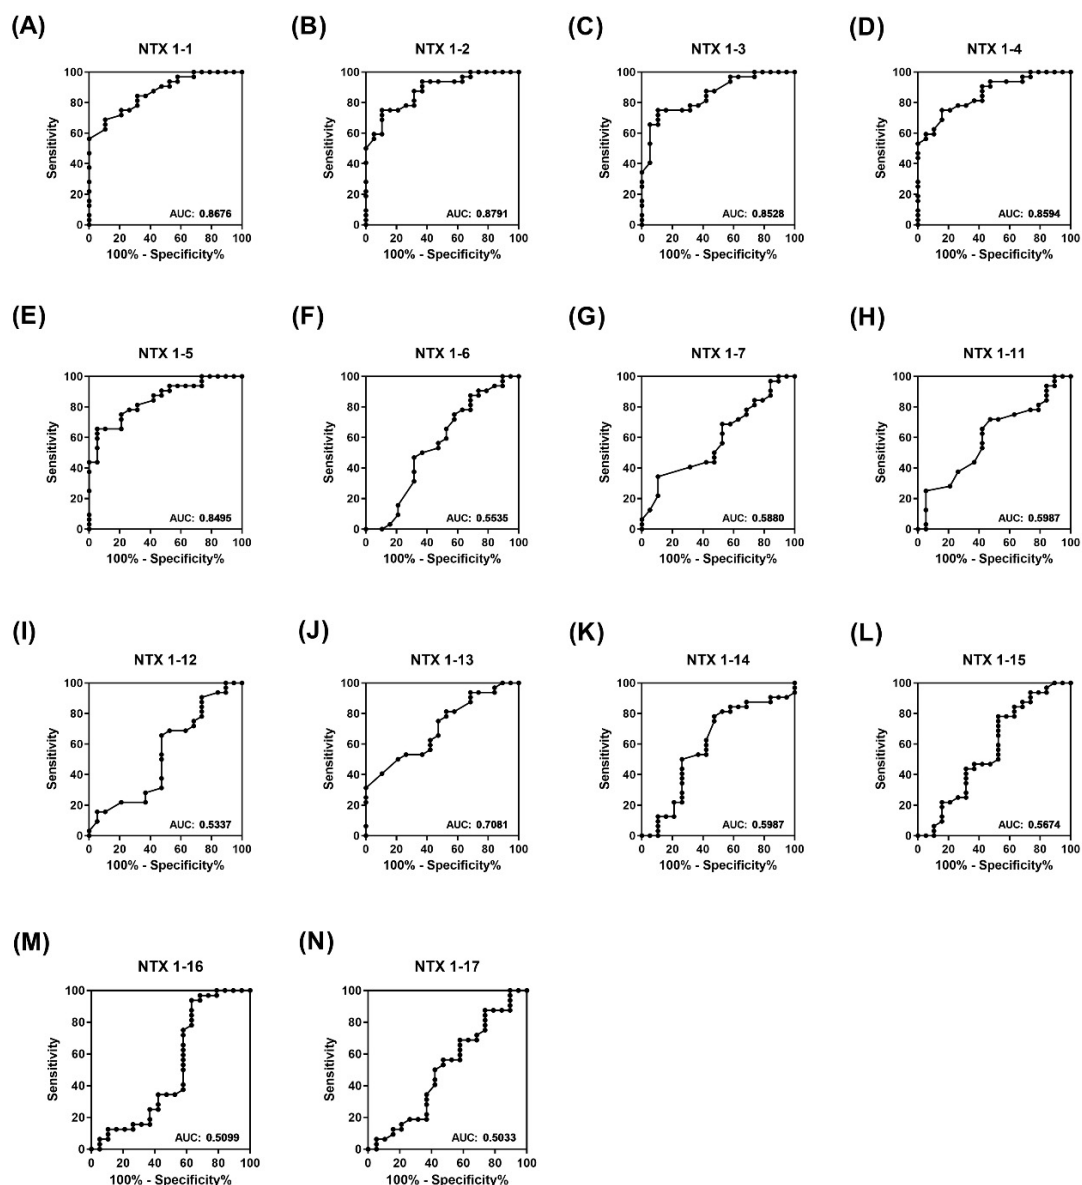

**Figure S2.** ROC curves of ELISA signals for 14 NTX-derived peptides differentiating between high- and low-potency plasma samples.
